# Supplementary material for: Exercise (Wheel-Running) Reduces Chronic Alcohol-Induced Escalation of Drinking in Mice via Elevated BDNF-TrkB Receptor Activity
Source: Research Square preprint supplement (doi:10.21203/rs.3.rs-8735131/v1), 2026-02-13
Supplement: Supplementary file 1 [file 7784fc4c3a2030512f801ea4.docx]

**Exercise (Wheel-Running) Reduces Chronic Alcohol-Induced Escalation of Drinking in Mice via Elevated BDNF-TrkB Receptor Activity**

**Howard C. Becker1,2,3,*, Matthew G. Solomon1,2, Anny Gano1,2, Marcelo F. Lopez1,2**

1 Charleston Alcohol Research Center, Medical University of South Carolina, Charleston, South Carolina 29425 USA

2 Departments of Neuroscience and Psychiatry, Medical University of South Carolina, Charleston, South Carolina 29425 USA

3 Ralph H. Johnson Department of Veterans Affairs Health Care System, Charleston, South Carolina 29401 USA

* Author to whom correspondence should be addressed

**SUPPLEMENTAL METHODS and MATERIALS**

#### **Brain Tissue Collection**

Mice were sacrificed by decapitation and brains rapidly removed. The medial prefrontal cortex (mPFC) and dentate gyrus region of the hippocampus (HPC) were sectioned (2-mm) and dissected on ice using 1-mm microdissection punches, with the mouse brain atlas serving as a guide (mPFC:  AP= 1.78 - 0.26, ML= 0.5, DV= 2.0; DG: AP= -1.94 to -3.40, ML= 0.5, DL= 1.5) [57]. Samples from each hemisphere were combined, placed into RNA Later (Thermo Fisher; cat no. AM7021), and total RNA was extracted using ReliaPrep RNA extraction kit (Promega; cat no. Z6012) according to the manufacturer’s instructions. Total RNA was quantified on a Denovix DS-11FX spectrophotometer.

#### **qRT-PCR Assay**

Quantitative real-time polymerase chain reaction (qRT-PCR) assays were performed using similar procedures to those previously published by our group [9]. For *Bdnf* exon I, IV, and IX mRNA measurements, cDNA was created using QuantiTect Reverse Transcription Kit (Qiagen; cat no 205314) according to manufacturer’s instructions. Custom designed TaqMan qRT-PCR primers were used to specifically target and amplify *Bdnf* exon (I, IV, IX) mRNA, using Integrated DNA Technologies (IDT) primer designer online software and manufactured by Life Technologies (BDNF I, Forward: GATGCCAGTTGCTTTGTCTTC; Reverse: CCACCACTTGGTGTGACTTAT; Probe: TCGCCAAGGTGGATGAGAGTTGAA; BDNF IV, Forward: GCCTAGATCAAATGGAGCTTCT; Reverse: GCCGATATGTACTCCTGTTCTG; Probe: ACCTCCGCCATGCAATTTCCACTA; BDNF IX, Forward: GTGACAGTATTAGCGAGTGGG; Reverse: GGGATTACACTTGGTCTCGTAG; Probe: CAGTTGGCCTTTGGATACCGGGA). Cyclophilin (Ppia) (Life Technologies) was used as the reference gene, for data normalization. For the reactions, 10 µl of sample cDNA and TaqMan Universal Master Mix II with UNG (Applied Biosystems; cat no 4440042) were loaded in triplicate into a 384-well optical PCR plate and analyzed on a BioRad CFX384 Real Time PCR system. Cycling parameters: 50° C for 2-min, 95° C for 10-min, followed by 40 amplification cycles with melting at 95° C for 15-sec, and annealing/extending at 60° C for 60 sec. Fluorescence readings are obtained after each cycle. The 2^-DDCT method [58] was used to calculated fold change in expression of the target gene relative to the reference gene (Ppia) using the CTL group as the reference condition.

**ELISA Assay**

Brain-derived neurotrophic factor (BDNF) protein was assayed using BDNF Duo ELISA (R & D Systems) as per manufacturer’s instructions. Briefly, brain tissue was lysed in 1% BSA in PBS pH 7.4 via sonication. Standards (0-1500 pg/mL) and samples were added in duplicate to a 96-well plate, coated with BDNF-capture antibody, and blocked with 1% bovine serum albumin (BSA). Plates were incubated at room temperature for 2-hr and washed with Wash buffer (0.1% Tween in PBS). Detection antibody was added to a 96-well microplate and incubated at room temperature for 2-hr and then washed with Wash buffer. Streptavidin-HRP was added to each well and incubated for 20 minutes. 50-µL Stop solution (ThermoFisher) was added to the well, and the plate was washed with Wash buffer.

**Supplemental Figure Legends**

**Supplemental Figure 1: Wheel-running is not altered by alcohol consumption (2-hr/day) in the home-cage.** Values are mean ± s.e.m. (N= 9-12/group).

**Supplemental Figure 2: Access to wheel-running (2-hr/day) does not alter alcohol consumption (2-hr/day) in the home-cage.** Values are mean ± s.e.m. (n= 12/group).

**Supplemental Figure 3: Weekly body weight (g) increased in all groups over the 6-week period of exercise/drinking**. There were no significant differences between groups, although there was a trend for the WH-EtOH group to register lower body weight at the end of the 6-weeks. Values are mean ± s.e.m. (N= 9-12/group).

**Supplemental Table 1. Blood alcohol concentration (mg/dl) registered during CIE cycles 1-4 for NWH-CIE and WH-CIE subjects.** Values are mean ± s.e.m. (N= 20/group).

|  | **NWH-CIE** | **WH-CIE** |
| --- | --- | --- |
| **Cycle 1** | 222.95 ± 13.01 | 223.44 ± 11.31 |
| **Cycle 2** | 208.69 ± 8.38 | 215.87 ± 11.68 |
| **Cycle 3** | 216.92 ± 12.01 | 222.12 ± 11.72 |
| **Cycle 4** | 209.56 ± 9.28 | 221.52 ± 15.46 |

**Supplemental Table 2: Weekly body weight (g) for each group (NWH-CTL, NWH-CIE, WH-CTL, WH-CIE) during the last baseline week and Test weeks 1-4.** Values are mean ± s.e.m. (N= 20/group) **^** significantly differs from NWH-CTL group (p< 0.05); ***** significantly differs from NWH-CTL group (ps< 0.05).

|  | **NWH-CTL** | **NWH-CIE** | **WH-CTL** | **WH-CIE** |
| --- | --- | --- | --- | --- |
| **Baseline** | 29.79 ± 0.45 | 29.81 ± 0.47 | 27.70 ± 0.33 ***** | 27.51 ± 0.32 ***** |
| **Test 1** | 29.67 ± 0.32 | 28.07 ± 0.22 **^** | 28.00 ± 0.33 ***** | 27.82 ± 0.32 ***** |
| **Test 2** | 29.82 ± 0.36 | 29.27 ± 0.31 | 28.09 ± 0.33 ***** | 28.36 ± 0.36 ***** |
| **Test 3** | 30.16 ± 0.41 | 27.84 ± 0.53 **^** | 28.74 ± 0.36 ***** | 28.05 ± 0.36 ***** |
| **Test 4** | 30.00 ± 0.39 | 27.64 ± 0.32 **^** | 28.71 ± 0.34 ***** | 27.00 ± 0.40 ***** |
